# Supplementary material for: The Millet of the Matter: Archeobotanical Evidence for Farming Strategies of Western Han Dynasty Core Area Inhabitants
Source: Front Plant Sci. 2022 Jun 30;13:929047. doi: 10.3389/fpls.2022.929047 (PMC9280989; doi:10.3389/fpls.2022.929047)
Supplement: Supplementary Table 1 — Macro-botanicaland isotopic data. [file Table_1.xlsx]

## Sheet: Table 1
Location	Site	Sample No.	Period	Context	Plant Remains	Reference
Xi'an, Shaanxi	Xizha	M20	Middle Western Han dynasty 141-48 BC	Pottery warehouse	Setaria italica	Xi'an Municipal Institution of Cultural Relics and Archaeology (2009). Tomb of the Eastern Han Dynasty in Xi'an. Beijing: Wenwu Press.
Xi'an, Shaanxi	Xizha	M20	Middle Western Han dynasty 141-48 BC	Pottery warehouse	Vigna angularis	Xi'an Municipal Institution of Cultural Relics and Archaeology (2009). Tomb of the Eastern Han Dynasty in Xi'an. Beijing: Wenwu Press.
Xi'an, Shaanxi	Xizha	M20: 3	Middle Western Han dynasty 141-48 BC	Pottery warehouse	Panicum miliaceum	Xi'an Municipal Institution of Cultural Relics and Archaeology (2009). Tomb of the Eastern Han Dynasty in Xi'an. Beijing: Wenwu Press.
Xi'an, Shaanxi	Xizha	M33: 4	Middle Western Han dynasty 141-48 BC	Pottery warehouse	Unidentifiable	Xi'an Municipal Institution of Cultural Relics and Archaeology (2009). Tomb of the Eastern Han Dynasty in Xi'an. Beijing: Wenwu Press.
Xi'an, Shaanxi	Xizha	M33: 6	Middle Western Han dynasty 141-48 BC	Pottery warehouse	Setaria italica	Xi'an Municipal Institution of Cultural Relics and Archaeology (2009). Tomb of the Eastern Han Dynasty in Xi'an. Beijing: Wenwu Press.
Xi'an, Shaanxi	Xizha	M33: 7	Middle Western Han dynasty 141-48 BC	Pottery warehouse	Glycine max	Xi'an Municipal Institution of Cultural Relics and Archaeology (2009). Tomb of the Eastern Han Dynasty in Xi'an. Beijing: Wenwu Press.
Xi'an, Shaanxi	Xizha	M33: 8	Middle Western Han dynasty 141-48 BC	Pottery warehouse	Panicum miliaceum	Xi'an Municipal Institution of Cultural Relics and Archaeology (2009). Tomb of the Eastern Han Dynasty in Xi'an. Beijing: Wenwu Press.
Xi'an, Shaanxi	Xizha	M47: 17	Middle Western Han dynasty 141-48 BC	Pottery warehouse	Setaria italica	Xi'an Municipal Institution of Cultural Relics and Archaeology (2009). Tomb of the Eastern Han Dynasty in Xi'an. Beijing: Wenwu Press.
Xi'an, Shaanxi	Xizha	M47: 23	Middle Western Han dynasty 141-48 BC	Pottery warehouse	Panicum miliaceum	Xi'an Municipal Institution of Cultural Relics and Archaeology (2009). Tomb of the Eastern Han Dynasty in Xi'an. Beijing: Wenwu Press.
Xi'an, Shaanxi	Xizha	M49: 9	Middle Western Han dynasty 141-48 BC	Pottery warehouse	Panicum miliaceum	Xi'an Municipal Institution of Cultural Relics and Archaeology (2009). Tomb of the Eastern Han Dynasty in Xi'an. Beijing: Wenwu Press.
Xi'an, Shaanxi	Xizha	M49: 10	Middle Western Han dynasty 141-48 BC	Pottery warehouse	Setaria italica	Xi'an Municipal Institution of Cultural Relics and Archaeology (2009). Tomb of the Eastern Han Dynasty in Xi'an. Beijing: Wenwu Press.
Xi'an, Shaanxi	Xizha	M19: 1	Middle Western Han dynasty 141-48 BC	Pottery warehouse	Glycine max	Xi'an Municipal Institution of Cultural Relics and Archaeology (2009). Tomb of the Eastern Han Dynasty in Xi'an. Beijing: Wenwu Press.
Xi'an, Shaanxi	Xizha	M7	Middle and late Western Han Dynasty 141 BC-AD 8	Pottery warehouse	Setaria italica	Xi'an Municipal Institution of Cultural Relics and Archaeology (2009). Tomb of the Eastern Han Dynasty in Xi'an. Beijing: Wenwu Press.
Xi'an, Shaanxi	Xizha	M7	Middle and late Western Han Dynasty 141 BC-AD 8	Pottery warehouse	Panicum miliaceum	Xi'an Municipal Institution of Cultural Relics and Archaeology (2009). Tomb of the Eastern Han Dynasty in Xi'an. Beijing: Wenwu Press.
Xi'an, Shaanxi	Shijia	M290: 9	Middle Western Han dynasty 141-48 BC	Pottery warehouse	Glycine max, Cannabis sativa	Xi'an Municipal Institution of Cultural Relics and Archaeology (2009). Tomb of the Eastern Han Dynasty in Xi'an. Beijing: Wenwu Press.
Xi'an, Shaanxi	Shijia	M290: 10	Middle Western Han dynasty 141-48 BC	Pottery warehouse	Panicum miliaceum	Xi'an Municipal Institution of Cultural Relics and Archaeology (2009). Tomb of the Eastern Han Dynasty in Xi'an. Beijing: Wenwu Press.
Xi'an, Shaanxi	Shijia	M2: 22	Middle Western Han dynasty 141-48 BC	Pottery warehouse	Setaria italica	Xi'an Municipal Institution of Cultural Relics and Archaeology (2009). Tomb of the Eastern Han Dynasty in Xi'an. Beijing: Wenwu Press.
Xi'an, Shaanxi	Shiyou	M22: 1③	Middle and late Western Han Dynasty 141 BC-AD 8	Pottery warehouse	Glycine max	Xi'an Municipal Institution of Cultural Relics and Archaeology (2009). Tomb of the Eastern Han Dynasty in Xi'an. Beijing: Wenwu Press.
Xi'an, Shaanxi	Shiyou	M22: 3③	Middle and late Western Han Dynasty 141 BC-AD 8	Pottery warehouse	Vigna angularis	Xi'an Municipal Institution of Cultural Relics and Archaeology (2009). Tomb of the Eastern Han Dynasty in Xi'an. Beijing: Wenwu Press.
Xi'an, Shaanxi	Shiyou	M22: 4①	Middle and late Western Han Dynasty 141 BC-AD 8	Pottery warehouse	Oryza sativa, Hordeum vulgare	Xi'an Municipal Institution of Cultural Relics and Archaeology (2009). Tomb of the Eastern Han Dynasty in Xi'an. Beijing: Wenwu Press.
Xi'an, Shaanxi	Shiyou	M22	Middle and late Western Han Dynasty 141 BC-AD 8	Pottery warehouse	Setaria italica, Panicum miliaceum	Xi'an Municipal Institution of Cultural Relics and Archaeology (2009). Tomb of the Eastern Han Dynasty in Xi'an. Beijing: Wenwu Press.
Xi'an, Shaanxi	Jiaoxiao	M95: 8	Middle and late Western Han Dynasty 141 BC-AD 8	Pottery warehouse	Setaria italica	Xi'an Municipal Institution of Cultural Relics and Archaeology (2009). Tomb of the Eastern Han Dynasty in Xi'an. Beijing: Wenwu Press.
Xi'an, Shaanxi	Jiaoxiao	M65: 1	Late Western Han Dynasty 48 BC-AD 8	Pottery warehouse	Panicum miliaceum	Xi'an Municipal Institution of Cultural Relics and Archaeology (2009). Tomb of the Eastern Han Dynasty in Xi'an. Beijing: Wenwu Press.
Xi'an, Shaanxi	Jiaoxiao	M65: 3	Late Western Han Dynasty 48 BC-AD 8	Pottery warehouse	Setaria italica	Xi'an Municipal Institution of Cultural Relics and Archaeology (2009). Tomb of the Eastern Han Dynasty in Xi'an. Beijing: Wenwu Press.
Xi'an, Shaanxi	Quchun	M23: 1	Late Western Han Dynasty 48 BC-AD 8	Pottery warehouse	Setaria italica	Xi'an Municipal Institution of Cultural Relics and Archaeology (2009). Tomb of the Eastern Han Dynasty in Xi'an. Beijing: Wenwu Press.
Xi'an, Shaanxi	Quchun	M23: 2	Late Western Han Dynasty 48 BC-AD 8	Pottery warehouse	Setaria italica	Xi'an Municipal Institution of Cultural Relics and Archaeology (2009). Tomb of the Eastern Han Dynasty in Xi'an. Beijing: Wenwu Press.
Xi'an, Shaanxi	Quchun	M23: 3	Late Western Han Dynasty 48 BC-AD 8	Pottery warehouse	Setaria italica	Xi'an Municipal Institution of Cultural Relics and Archaeology (2009). Tomb of the Eastern Han Dynasty in Xi'an. Beijing: Wenwu Press.
Xi'an, Shaanxi	Quchun	M23: 4	Late Western Han Dynasty 48 BC-AD 8	Pottery warehouse	Setaria italica	Xi'an Municipal Institution of Cultural Relics and Archaeology (2009). Tomb of the Eastern Han Dynasty in Xi'an. Beijing: Wenwu Press.
Xi'an, Shaanxi	Quchun	M23: 5	Late Western Han Dynasty 48 BC-AD 8	Pottery warehouse	Setaria italica	Xi'an Municipal Institution of Cultural Relics and Archaeology (2009). Tomb of the Eastern Han Dynasty in Xi'an. Beijing: Wenwu Press.
Xi'an, Shaanxi	Quchun	M16: 2	Late Western Han Dynasty 48 BC-AD 8	Pottery warehouse	Vigna angularis, Setaria italica, Hordeum vulgare	Xi'an Municipal Institution of Cultural Relics and Archaeology (2009). Tomb of the Eastern Han Dynasty in Xi'an. Beijing: Wenwu Press.
Xi'an, Shaanxi	Quchun	M18: 1	Late Western Han Dynasty 48 BC-AD 8	Pottery warehouse	Setaria italica	Xi'an Municipal Institution of Cultural Relics and Archaeology (2009). Tomb of the Eastern Han Dynasty in Xi'an. Beijing: Wenwu Press.
Xi'an, Shaanxi	Sanzhao	M3	Late Western Han Dynasty 48 BC-AD 8	Pottery warehouse	Setaria italica	Xi'an Municipal Institution of Cultural Relics and Archaeology (2009). Tomb of the Eastern Han Dynasty in Xi'an. Beijing: Wenwu Press.
Xi'an, Shaanxi	Sanzhao	M3	Late Western Han Dynasty 48 BC-AD 8	Pottery warehouse	Panicum miliaceum	Xi'an Municipal Institution of Cultural Relics and Archaeology (2009). Tomb of the Eastern Han Dynasty in Xi'an. Beijing: Wenwu Press.
Xi'an, Shaanxi	Sanzhao	M3	Late Western Han Dynasty 48 BC-AD 8	Pottery warehouse	Glycine max	Xi'an Municipal Institution of Cultural Relics and Archaeology (2009). Tomb of the Eastern Han Dynasty in Xi'an. Beijing: Wenwu Press.
Xi'an, Shaanxi	Sanzhao	M3	Late Western Han Dynasty 48 BC-AD 8	Pottery warehouse	Hordeum vulgare	Xi'an Municipal Institution of Cultural Relics and Archaeology (2009). Tomb of the Eastern Han Dynasty in Xi'an. Beijing: Wenwu Press.
Xi'an, Shaanxi	Sanzhao	M3	Late Western Han Dynasty 48 BC-AD 8	Pottery warehouse	Cannabis sativa, Setaria italica, Panicum miliaceum	Xi'an Municipal Institution of Cultural Relics and Archaeology (2009). Tomb of the Eastern Han Dynasty in Xi'an. Beijing: Wenwu Press.
Xi'an, Shaanxi	Sanzhao	M4	Late Western Han Dynasty 48 BC-AD 8	Pottery warehouse	Vigna angularis, Coix lacryma-jobi	Xi'an Municipal Institution of Cultural Relics and Archaeology (2009). Tomb of the Eastern Han Dynasty in Xi'an. Beijing: Wenwu Press.
Xi'an, Shaanxi	Sanzhao	M4	Late Western Han Dynasty 48 BC-AD 8	Pottery warehouse	Triticum aestivum	Xi'an Municipal Institution of Cultural Relics and Archaeology (2009). Tomb of the Eastern Han Dynasty in Xi'an. Beijing: Wenwu Press.
Xi'an, Shaanxi	Ligong	M13: 6	Late Western Han Dynasty 48 BC-AD 8	Pottery warehouse	Oryza sativa	Xi'an Municipal Institution of Cultural Relics and Archaeology (2009). Tomb of the Eastern Han Dynasty in Xi'an. Beijing: Wenwu Press.
Xi'an, Shaanxi	Ligong	M9: Collection	Early Eastern Han Dynasty AD 25-88	Pottery warehouse	Castanea mollissima	Xi'an Municipal Institution of Cultural Relics and Archaeology (2009). Tomb of the Eastern Han Dynasty in Xi'an. Beijing: Wenwu Press.
Xi'an, Shaanxi	Hairong	M23: 14	Late Western Han Dynasty 48 BC-AD 8	Pottery warehouse	Setaria italica	Xi'an Municipal Institution of Cultural Relics and Archaeology (2009). Tomb of the Eastern Han Dynasty in Xi'an. Beijing: Wenwu Press.
Xi'an, Shaanxi	Ronghai	M2: 11	Late Western Han Dynasty 48 BC-AD 8	Pottery warehouse	Unidentifiable	Xi'an Municipal Institution of Cultural Relics and Archaeology (2009). Tomb of the Eastern Han Dynasty in Xi'an. Beijing: Wenwu Press.
Xi'an, Shaanxi	Yannan	M1: 18	Late Western Han Dynasty 48 BC-AD 8	Pottery warehouse	Panicum miliaceum	Xi'an Municipal Institution of Cultural Relics and Archaeology (2009). Tomb of the Eastern Han Dynasty in Xi'an. Beijing: Wenwu Press.
Xi'an, Shaanxi	Yanhu	M16: 4	Middle Eastern Han Dynasty AD 88-189	Pottery warehouse	Setaria italica, Panicum miliaceum	Xi'an Municipal Institution of Cultural Relics and Archaeology (2009). Tomb of the Eastern Han Dynasty in Xi'an. Beijing: Wenwu Press.
Xi'an, Shaanxi	Yanhu	M16: 5	Middle Eastern Han Dynasty AD 88-189	Pottery warehouse	Setaria italica, Panicum miliaceum	Xi'an Municipal Institution of Cultural Relics and Archaeology (2009). Tomb of the Eastern Han Dynasty in Xi'an. Beijing: Wenwu Press.

## Sheet: Table 2
Location	Site	Period	Archaeological material	Average value of δ13C	Average value of δ15N	Standard deviation of δ13C	Standard deviation of δ15N	Number of samples	Reference
Sanyuan, Shaanxi	Guandao	Mid WH to Late EH 141 BC-AD 220	Human bone	-10.74	10.36	0.7	0.2	5	Zhang, G.W., Hu, Y.W., Olaf, N., Yang, W.Z., Liu, D.Y., Song, G.D., et al. (2013). Stable isotopic analysis of the dietary difference between Han people who lived in Guanzhong basin and nomadic people in north China. Huaxia Archaeology (03), 131-141.
Gaoling, Shaanxi	Guangming	Western Han dynasty 202 BC-AD 8	Human bone	-9.83	10.99	0.8	0.8	7	Zhang, G.W., Hu, Y.W., Olaf, N., Yang, W.Z., Liu, D.Y., Song, G.D., et al. (2013). Stable isotopic analysis of the dietary difference between Han people who lived in Guanzhong basin and nomadic people in north China. Huaxia Archaeology (03), 131-141.
Xi'an, Shaanxi	Jichang	Eastern Han dynasty AD 25-220	Human bone	-11.97	8.97	1.2	0.8	30	Zhang, G.W., Hu, Y.W., Olaf, N., Yang, W.Z., Liu, D.Y., Song, G.D., et al. (2013). Stable isotopic analysis of the dietary difference between Han people who lived in Guanzhong basin and nomadic people in north China. Huaxia Archaeology (03), 131-141.
